# Supplementary material
Source: Springer Nature journal article supplement (https://www.springermedizin.de/resource/supplementary/12889_2006_891_MOESM5_ESM.pdf/9502008)

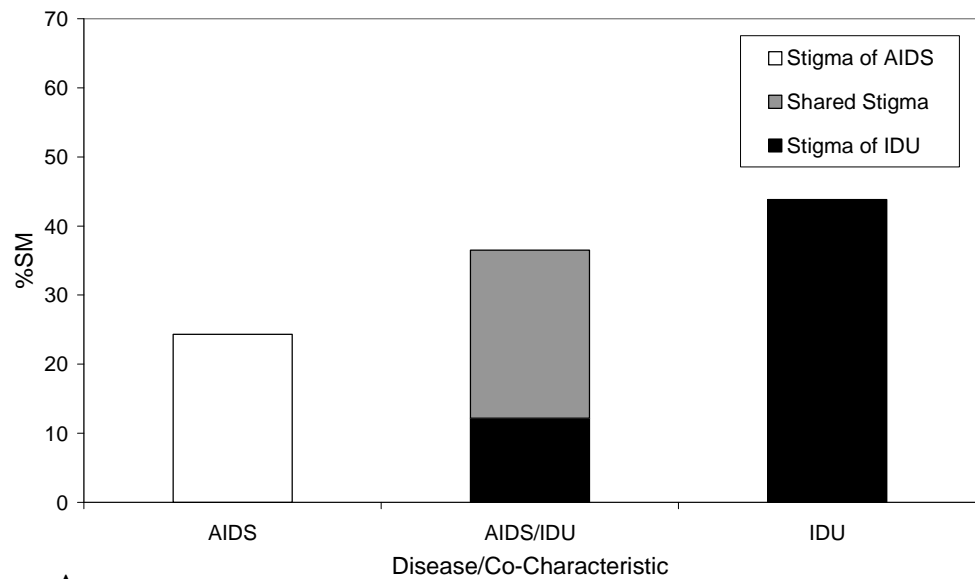

**A**

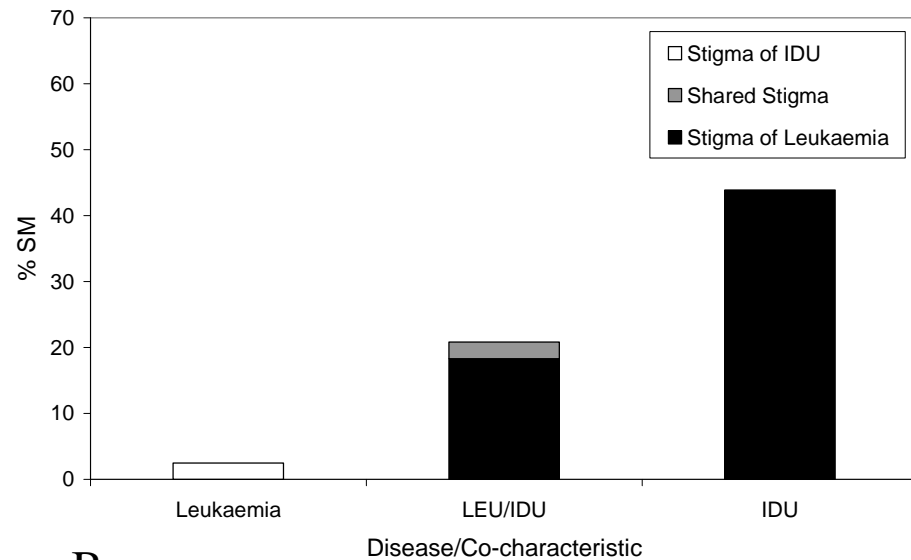

**B**

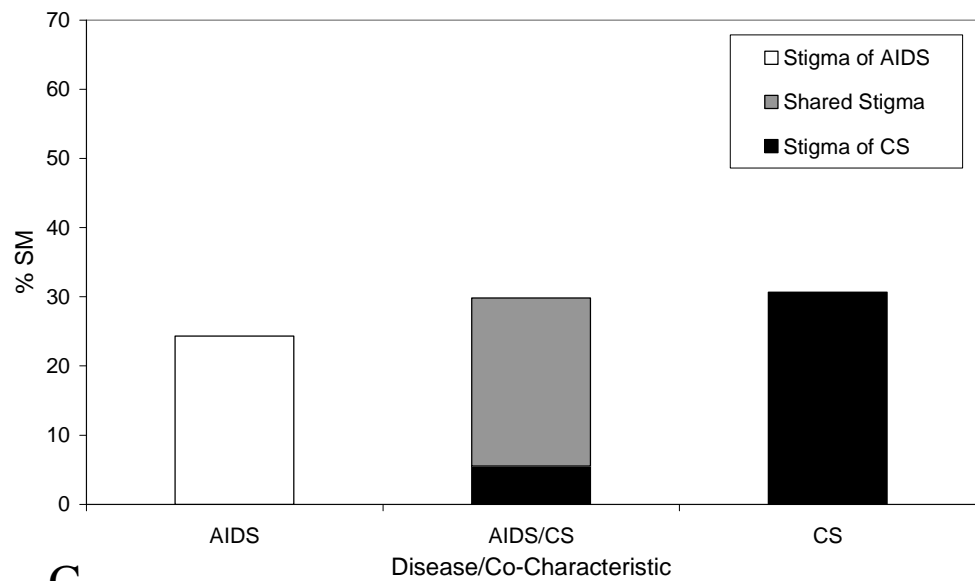

**C**

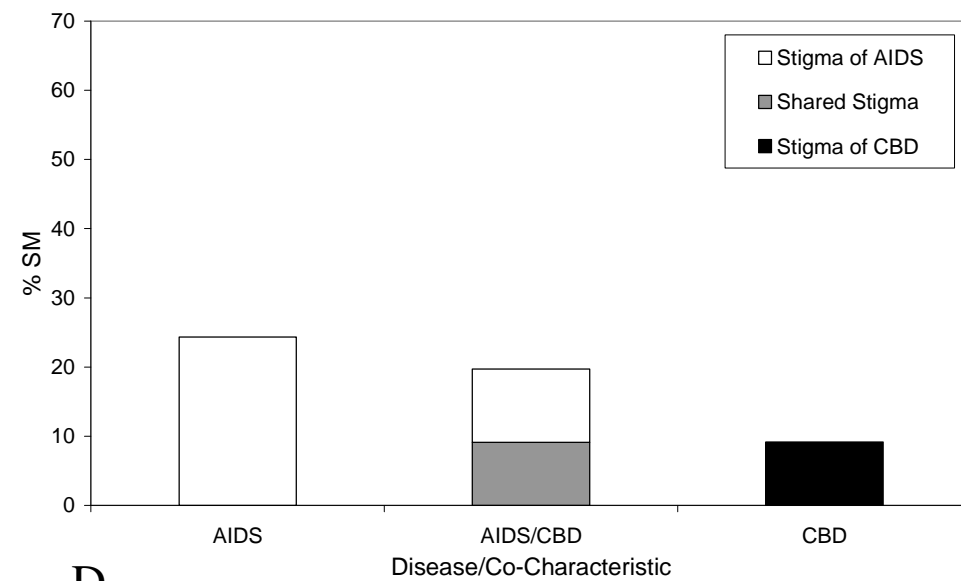

**D**

Supplement: MOESM5 [file 9502008]
